# Supplementary material for: Modelling six sustainable development transformations in Australia and their accelerators, impediments, enablers, and interlinkages
Source: PubMed Central journal article supplement (PMC10796343; doi:10.1038/s41467-023-44655-4), 2024-01-18
Supplement: 41467_2023_44655_MOESM3_ESM.pdf [file 41467_2023_44655_MOESM3_ESM.pdf]

## **Description of Additional Supplementary Files**

File Name: Supplementary Data 1

Description: This file contains additional supplementary datasets to support the manuscript: 1. Model\_Data includes the input dataset used to calibrate the iSDG-Australia 2.0 system dynamics model; and 2. Model\_Projections\_2050 provides the model projections from 2020 to 2050 for the two modelled pathways across a range of key indicators (BBS=Build Back the Same Pathway and represents the baseline scenario; STP=Six Transformations Pathway).
